# Supplementary material
Source: MDPI journal article supplement (https://www.mdpi.com/2073-4441/8/4/135)
Supplement: s1 [file s1]

## Sheet: BSD - Siting info.
Number	Geology	Faults and fractures	Recharge	Current boreholes	Land availability	Other	Comments
1	Rock formation		Not necessarily	Not necessarily		Groundwater levels and quality	Seeks knowledge from experts
2	High potential areas (should be first)	Geophyisical survey - look for linearements		Sustainability	First	Investigate contamination	Siting from engineers
3	Check that the aquifer has enough water		No recharge area	Dry/drying up	Land is scarce	Contamination risks (far from latrines)
4	Aquifer with good discharge	Fractures on QGIS					Help from LWSC
5
6	Geophysical background, log formation Is the area waterlogged?	Looks at linearments after Ian Sutton			X
7	Using recent QGIS maps		QGIS showed that boreholes were sited in recharge areas				Help from Water Affairs experts
8	Geophysical survey	After Ian (geology at smaller scale) - also hydrology and contours	Does not have the information	Use but no access to precise information (at least 70m from next BH)		Yield (at least 10l/s)	Knows what is required but pressure from government to favour land availability Geophysical survey with Terms of Reference; prefers that geophysics and drilling are same contract
9	Type of ground	Looks at streams, faults		After Ian	Not really available
10	First (maps)		Not aware where they are Poblem of city planning that is reducing recharge areas		Second	Contracts for geophysical survey and drilling (PIU)	Map allowed to choose another place in Chazanga
11	General geology					Topography and outcrops
12
13	After Eric: geology (contracted)				Free from houses and toilets	Look at whether surface water can contaminate
14	Rock formation for water potential and vulnerability					Underground WL, "water belt"
15	Dolomite formation (academic point of view)		Comes from the East		Already bought and reserved	History and local knowledge (traditional point of view) Issue of vulnerability

## Sheet: BSD - Info. sources
Number	BGR maps	Department of W.A.	Information from trainings	Local knowledge	Others	Needs
1	Hasn't seen them		Some websites and publications, Google Earth			More information required
2	X	X	Use internet+GPS to identify potential places			Need for more detailed maps QGIS relies on the internet and is thus not really adapted
3	Map provided by WSUP/LWSC				Geophysical surveys	Need more information and advice from experts in particular for linearments
4	X	X	QGIS			Need (re)training in QGIS
5
6	X	Not much formation		Mostly		Maps not precise enough QGIS could be even simplified
7		X	QGIS		LWSC	More specific and latest data would be useful
8	GReSP major source of information	Rarely				Still depends on consultants to understand information
9	Ian added current boreholes				Geophysical surveys that use information from Department of WA and Azurite (consultant)
10		Maps (maybe GReSP)				Not only maps of general geology but also details of fractures Need for reducing the number of boreholes drilled for nothing
11
12		Maps (maybe GReSP)
13					Ministry of lands (geology for high potential)	More detailed information is required (as provided by WSUP)
14	Vulnerability map (one in future)				Consulting PUD
15			WSUP		LWSC GIS department Rankin (consultant) Advanced technology with GPS	Many gaps

## Sheet: BSD - Completion
Number	Depth	Pump position	Fractures	Casing	Yield	Water levels	Water quality	Design life	Technical parts	Others	Format	Communicated to	Needs
1					X				For maintenance
2					X		X	X	Pump size		Hard copy (difficult to access specific data once report is handed in)		Dynamic water level Design of electrical panel
3	X			X	X
4	X			X	X		X					LWSC and pump suppliers
5
6					Daily production							Kept for WT
7	X		X		X						Report from drillers		Actual borehole yield would be enough
8	X	X		X	Pump test results	Static and dynamic			Mechanical and electrical equipment	Date of completion	Hard copy + electronic summary	Emailed to WSD (hard copy on request)
9											Tried to establish a database with Eric
10											Gap in production of reports
11
12	X									Borehole condition and location
13	X		X		X				Type of pump	Geological log	Hard copy
14	X				Allows to choose the pump						Hard copy
15						X	X			Info about whole drilling process	Hard copy + soft copy on GIS

## Sheet: WLQM - Data collection
Number	Chlorine residues	Other	LWSC	Water levels	Additional data required	Format	WSUP's database
1	2-3 times a week		Not sure what is measured	Once (if it was to be measured: every 3 months)	Borehole lifespan	Hard copy	Hasn't heard about it but is enthusiastic
2	Daily	Microbiology twice a year at University of Zambia with the Minsitry of Health	Periodically	Twice daily (since July)	Industrial contamination (metals, chemicals) Need help to moitor WQ and to know whether in compliance with WHO	Hard copy	Not aware
3	2-3 times a week		Random once a week	Measured once last year	Bacterial, content in iron Water levels (but not received datalogger)	Hard copy	Not aware
4	Twice daily		Around monthly (more often during rainy season)	Weekly (started recently)	Nothing else	Hard copy
5		Total and faecal coliforms, turbidity, pH, colour, conductivity (daily) Nitrates (monthly) Heavy metal (quaterly at Zambian Bureau of Standards)			Pesticides Heavy metals (at LWSC laboratory) Hydrocarbures (contamination from filling stations)	Hard copy Electronic (available to WSD directors and branch managers)
6	X		X	Static levels and drawdowns weekly since completion	Borehole lifespan	Hard copy Communication of WL to LWSC, then regulator NAWASCO
7	Nearly every day	Ministry of Health during rainy season	Weekly	Weekly (but haven't started yet)	Water levels (when less rain, leveles fall and fail to meet demand)	Hard copy	Has heard and thinks it's a good idea
8		Condition of borehole and equipment		At any given time (as frequently as possible: start weekly, then biweekly, monthly… if it doesn't change)		If wants the information, needs to ask WSD
9	Daily		Haven't been here since April 2014	For some time, not any data! Dipmeters were stuck; were given a tape by WSUP	Water levels, time for borehole to discharge	Hard copy
10
11	X	Borehole discharge Physical parameters (turbidity, conductivity…), faecal coliforms		Not for a long time; just bought dippers	Water levels are important Metal and hydrocarbures should be measured, but lack the capacity	Access database for WSD Monthly reports are circulated
12		Borehole discharge		Only some boreholes but pushing forward	Water levels and water quality (WSD)	Data put into EDAMS software, accessible to WSD on request
13	Daily	Microbiology once a month taken to lab Turbidity	Weekly during rainy season Monthly during dry season	Monthly (with tape)		Hard copy Lab samples transmitted to LWSC
14	Daily	Yield (twice daily); meter readings from water points	Every day for chlorine	Once in a while	Increase WL monitoring to monthly	Monthly report to LWSC Quaterly report to board	Hasn't heard about it
15	Daily	Water samples brought to University of Zambia twice a year Recently aquired equipment to measure faecal coliforms		Not yet	Vulnerability (as more people build close to boreholes)	Hard copy + soft copy at LWSC

## Sheet: WLQM - LWSC&WT
Number	At the moment	Improvement
1	OK - LWSC provides guidance, training, technical assistance and feedback when WQ results are negative
2	Starts to turn into competition!! LWSC charges WT for any request; LWSC used to give feedback but stopped
3	Receives feedback only if not enough chlorine; LWSC provides very helpful advice	Usage of new technologies
4	LWSC doesn't give feedback when WQ results are positive WT used to send monthly reports but stopped because no feedback "no one is interested"	Need more technical advice (engineer once in a while)
5	Results shared with WT managers if ot ok; assistance provided	Communication with WT: forum to meet once in a while
6	Happy with sharing; WSD doesn't provide information systematically but can request
7	The LWSC only gives feedback when results are negative
8	In touch with WT during borehole completion	WT should give more feddback
9	They just come and pick samples; just tell when it's wrong WT management forum quaterly with all managers	Need for more two-way sharing on groundwater sources, pump maintenance…
10	WT produce monthly reports with only pumping rates; help is given by WSD and PUD to small WT	WT require quality is communicated to them even if it is good
11	No data shared; not sure about WQ results, at least when quality is bad	Sharing data with WT: ok only for what concerns each WT
12	LWSC provides technical support; monthly reports are fine	WT schemes need improvement Borehole management: sharing with relevant department
13	Happy with data sharing	Needs to be criticised to know where to improve Has heard about database but needs further training
14	Useful	Need more training and meetings to share information
15	Just at the inception stage Data is shared and capacity training is offered	Need for more maps, distribution lines, data about WQ Doesn't know what LWSC will be doing

## Sheet: Conclusion
Number	Training	Equipment	Information	Anything else
1	X	X		Always looking forward to such training programmes
2		Datalogger from Eric (still waiting)	Behaviour of borehole
3			X	Need to share data at general level
4	To people involved in production		X	No
5			On other aspects of boreholes	Need for more funding for labs; feels like it's not taken seriously enough
6	Lack of capacity		Need comprehensive information	A lot to be done; land sections need to be protected
7				Shallow wells: change people's minds to switch to piped water; also lack monitoring of contamination Concerned that boreholes in WT will dry up or be contaminated
8			More data sharing: comprehensive database accessed with password	A borehole unit that would be the only one responsible would be of great value Very helpful to have Ian's information to make certain decisions
9	X	Lack of finance to get appropriate equipment	X	Project is a good start
10	Most have basic understanding but some need to start from scratch		Reports are missing, has to ask for them	Has seen some improvement
11			Hydrogeology, boreholes (doesn't know safe yields!)
12			Sometimes hard to get some information Hard to be sharing all ideas	Glad to embark on such a monitoring scheme
13	Happy to learn		X	Needs help from WSUP WT started small with the help of CARE but needs donors to expand (grew quickly, from 1 to 6 boreholes)
14			For planning (rocks, areas, vulnerability of GW)
15	Capacity building required		"Operating in the darkness"
